# Supplementary material for: Copper zinc tin sulfide as a catalytic material for counter electrodes in dye-sensitized solar cells
Source: Royal Society of Chemistry journal article supplement (doi:10.1039/c4ta02319f), 2014-10-15
Supplement: c4ta02319f1.pdf [file c4ta02319f1.pdf]

## Electronic Supplementary Information

### Copper Zinc Tin Sulfide as the Catalytic Materials for Counter Electrodes in Dye-Sensitized Solar Cells

Miao-Syuan Fan,<sup>‡a</sup> Jian-Hao Chen,<sup>‡b</sup> Chun-Ting Li,<sup>a</sup> Kong-Wei Cheng,<sup>\*b</sup> and Kuo-Chuan Ho<sup>\*ac</sup>

<sup>a</sup>*Department of Chemical Engineering, National Taiwan University, Taipei 10617, Taiwan*

<sup>b</sup>*Department of Chemical and Materials Engineering, Chang Gung University, Tao-Yuan 333, Taiwan*

<sup>c</sup>*Institute of Polymer Science and Engineering, National Taiwan University, Taipei 10617, Taiwan*

\* *To whom correspondence should be addressed: [kcho@ntu.edu.tw](mailto:kcho@ntu.edu.tw) (K. C. Ho) and [kwcheng@mail.cgu.edu.tw](mailto:kwcheng@mail.cgu.edu.tw) (K. W. Cheng)*

<sup>‡</sup> *These authors contributed equally*

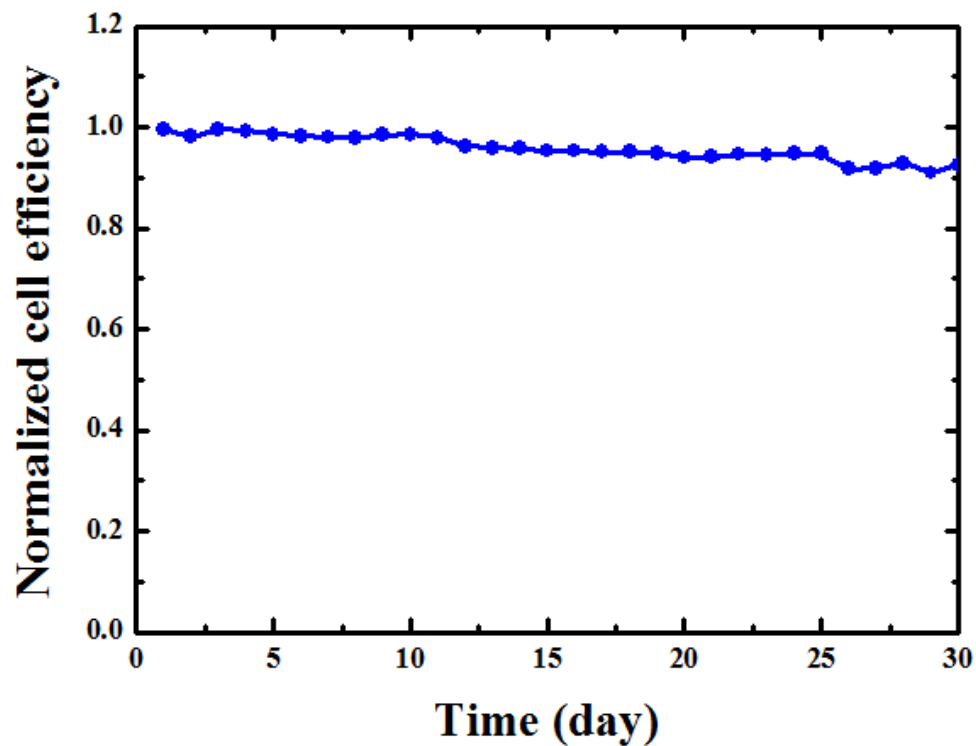

**Fig. S1** At-rest long-term stability data of the DSSC with sample (C) CZTS as the counter electrode material in an ionic liquid electrolyte, containing 0.2 M I<sub>2</sub> and 0.5 M TBP in a mixture solvent of BMII/EMIBF<sub>4</sub> (volume ratio = 65/35), obtained at 100 mW cm<sup>-2</sup>.

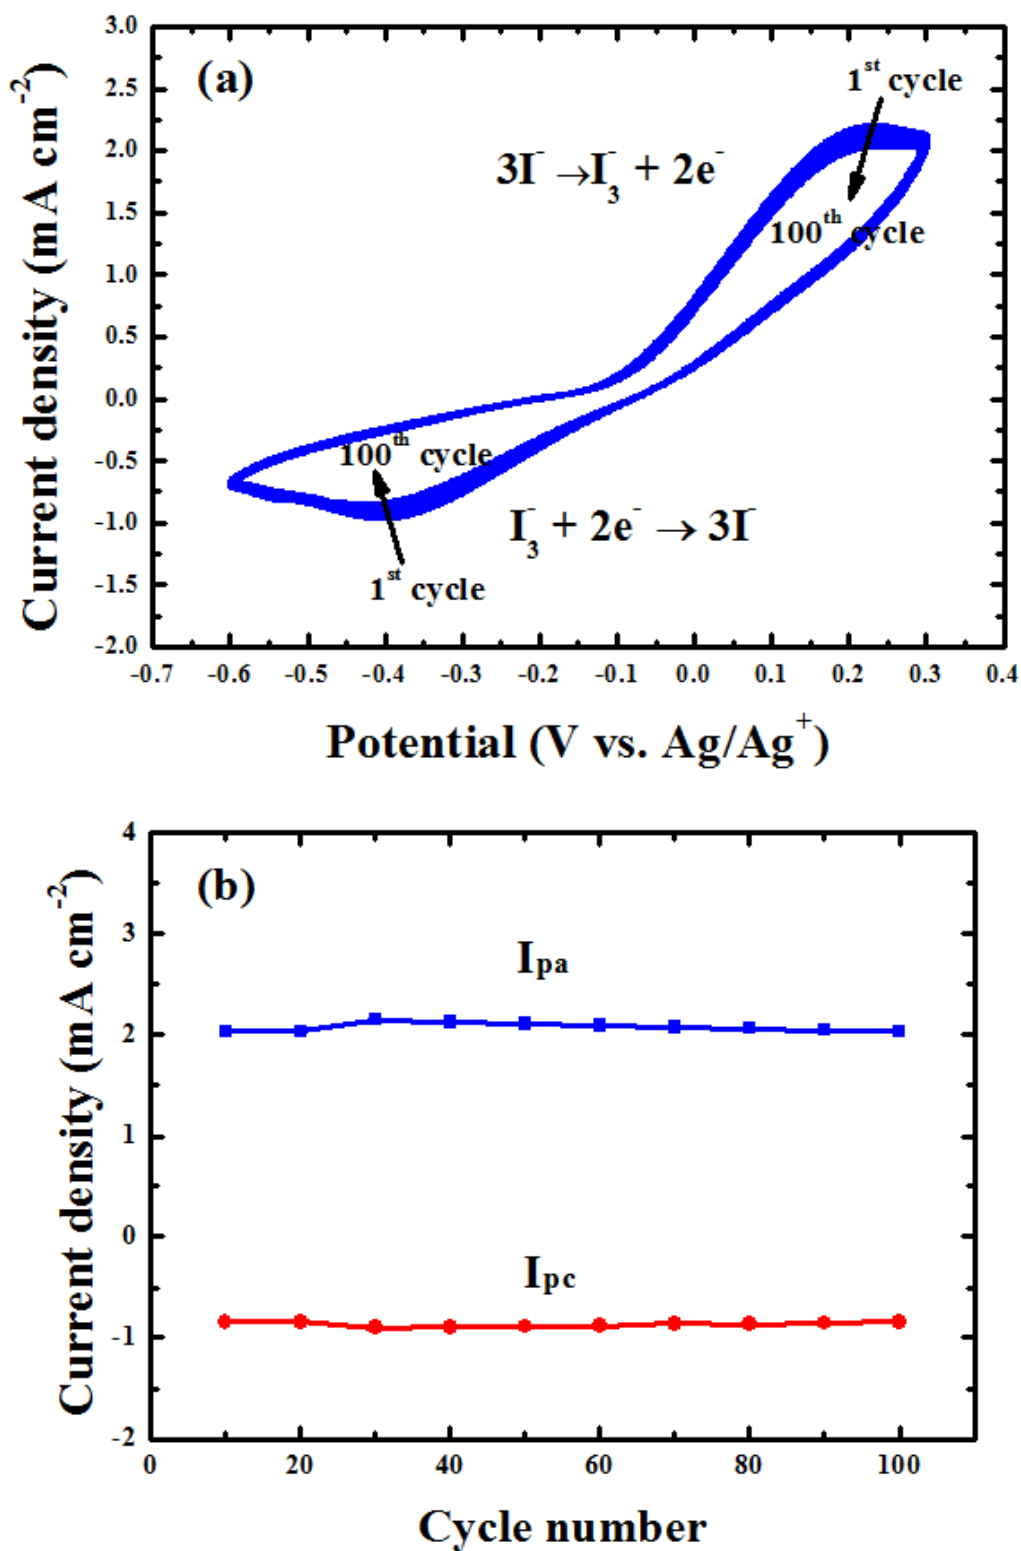

**Fig. S2** (a) Cyclic voltammograms of the CZTS CE with sample (C), obtained for 100 cycles; (b) corresponding anodic and cathodic peak current densities ( $J_{pa}$  and  $J_{pc}$ , respectively) as a function of the cycle number. The CVs were obtained in the electrolyte containing 10.0 mM LiI, 1.0 mM  $\text{I}_2$ , and 0.1 M  $\text{LiClO}_4$  in ACN, at a scan rate of 100 mV/s.

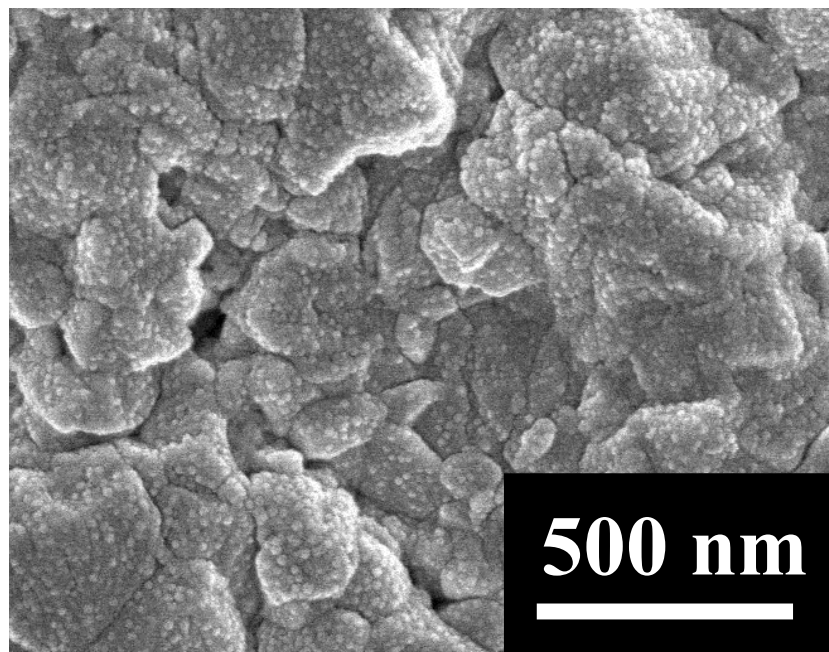

**Fig. S3** Plane view FE-SEM image of sample (C).

**Table S1** X-ray photoelectron spectroscopy analysis of the composite CZTS CEs.

| CEs | Molar % of CZTS |       |       |       | [Cu]/[Zn]+[Sn] | [S]/Metal |
|-----|-----------------|-------|-------|-------|----------------|-----------|
|     | Cu              | Zn    | Sn    | S     |                |           |
| (A) | 30.21           | 6.41  | 14.25 | 49.62 | 1.46           | 0.98      |
| (B) | 27.32           | 10.05 | 13.72 | 50.12 | 1.15           | 0.98      |
| (C) | 25.41           | 11.77 | 13.33 | 50.03 | 1.01           | 0.99      |
| (D) | 23.26           | 12.99 | 14.03 | 49.72 | 0.86           | 0.99      |
| (E) | 22.03           | 15.23 | 13.20 | 49.64 | 0.77           | 0.98      |
